# Supplementary material for: Composition of soil fungal communities and microbial activity along an elevational gradient in Mt. Jiri, Republic of Korea
Source: PeerJ. 2025 Jan 15;13:e18762. doi: 10.7717/peerj.18762 (PMC11748422; doi:10.7717/peerj.18762)
Supplement: Supplemental Information 1 [file peerj-13-18762-s001.xlsx]

## Sheet: Soil_Properties
Sampling_date	Sample_id	Elevation_level	pH	SWC	MBC	Soil_temp	Soil_org	Soil_CEC	Soil_TN	Soil_TC	Soil_NH4	Soil_NO3	Soil_inorganicN
21.09	E6-1-1	600	5.24	36.2888	1412.15	18.6	11.69	32.02	0.5993	5.7902	2.51663	4.04899	6.56563
21.09	E6-1-2	600	5.26	37.1905	1398.1	18.6	11.69	32.02	0.5993	5.7902	3.61418	4.14271	7.7569
21.09	E6-2-1	600	4.98	28.1601	1091.59	18.9	16.66	31.49	0.7345	9.6686	2.11102	1.15702	3.26804
21.09	E6-2-2	600	5.02	29.336	1163.32	18.9	16.66	31.49	0.7345	9.6686	1.99967	1.23736	3.23703
21.09	E10-1-1	1000	5.91	25.4746	556.71	17.7	55.58	17.76	0.4992	3.7728	1.17651	6.99452	8.17103
21.09	E10-1-2	1000	5.97	24.4359	679.59	17.5	55.58	17.76	0.4992	3.7728	0.723175	5.5887	6.31188
21.09	E10-2-1	1000	6.08	29.9118	855.92	17.3	13.43	23.59	0.7613	7.2975	2.1985	6.52591	8.72442
21.09	E10-2-2	1000	5.99	30.407	967.28	17.1	13.43	23.59	0.7613	7.2975	2.3695	7.67734	10.0468
21.09	E10-3-1	1000	4.23	40.1688	1433.61	17.5	29.66	54.49	0.6905	8.6781	3.89255	1.17041	5.06296
21.09	E10-3-2	1000	4.27	39.854	1570.67	18.5	29.66	54.49	0.6905	8.6781	2.63991	1.33108	3.97099
21.09	E14-1-1	1400	4.77	40.2194	1145.28	14.6	10.53	29.22	0.5007	3.9738	1.95991	3.19211	5.15202
21.09	E14-1-2	1400	4.83	39.4797	1440.83	14.8	10.53	29.22	0.5007	3.9738	1.88037	3.27245	5.15282
21.1	E2110-6-1-1	600	5.41	26.9329	1551.96
21.1	E2110-6-1-2	600	5.43	27.0568	1573.14
21.1	E2110-6-2-1	600	5.54	28.7826	1412.73
21.1	E2110-6-2-2	600	5.53	28.5838	1475.26
21.1	E2110-6-3-1	600	5.21	35.7002	1846.82
21.1	E2110-6-3-2	600	5.18	35.4743	1838.9
21.1	E2110-12-1-1	1200	4.81	46.6912	2184.7
21.1	E2110-12-1-2	1200	4.83	46.4088	2153.1
21.1	E2110-12-2-1	1200	5.13	46.6341	2179.14
21.1	E2110-12-2-2	1200	5.12	46.6276	2241.5
21.1	E2110-12-3-1	1200	5	43.6827	2024.9
21.1	E2110-12-3-2	1200	4.99	43.6275	2050.52
22.04	E224-6-1-1	600	5.11	30.9787	1509.21
22.04	E224-6-1-2	600	5.12	30.7892	1521.15
22.04	E224-6-2-1	600	5.03	33.7838	1652.41
22.04	E224-6-2-2	600	5.06	34.1442	1678.49
22.04	E224-6-3-1	600	5.01	33.8117	1719.68
22.04	E224-6-3-2	600	4.98	34.5004	1732.19
22.04	E224-10-1-1	1000	5.63	28.9264	1068.91
22.04	E224-10-1-2	1000	5.6	29.9024	1077.81
22.04	E224-10-2-1	1000	5.57	33.5664	1157.88
22.04	E224-10-2-2	1000	5.56	33.305	1166.22
22.04	E224-14-1-1	1400	4.92	38.5274	1801.11
22.04	E224-14-1-2	1400	4.94	37.8552	1813.18
22.04	E224-14-2-1	1400	5.1	45.7555	1968.02
22.04	E224-14-2-2	1400	5.12	41.9698	1952.7
22.04	E224-14-3-1	1400	4.76	45.5471	2010.89
22.04	E224-14-3-2	1400	4.76	45.823	2042.44
22.09	E229_6-1-1	600	5.19	25.5068	1323.56
22.09	E229_6-1-2	600	5.2	26.9036	1330.54
22.09	E229_6-2-1	600	5.22	27.3684	1821.65
22.09	E229_6-2-2	600	5.2	30.4348	1848.6
22.09	E229_6-3-1	600	5.05	29.4872	1868.04
22.09	E229_6-3-2	600	5.04	30.137	1872.34
22.09	E229_10-1-1	1000	5.81	31.6988	1185.92
22.09	E229_10-1-2	1000	5.87	30.0725	1175.59
22.09	E229_10-2-1	1000	6.14	23.0637	1030.78
22.09	E229_10-2-2	1000	6.13	25.5537	1040.59
22.09	E229_10-3-1	1000	4.97	32.5383	2560.44
22.09	E229_10-3-2	1000	5.02	38.7153	2627.55
22.09	E229_12-1-1	1200	4.84	45.3608	1799.65
22.09	E229_12-1-2	1200	4.82	42.8322	1773.88
22.09	E229_12-2-1	1200	4.91	47.028	2517.3
22.09	E229_12-2-2	1200	4.93	47.0383	2517.42
22.09	E229_12-3-1	1200	4.8	40.9408	2125.52
22.09	E229_12-3-2	1200	4.8	44.484	2147.82
22.09	E229_14-1-1	1400	5.07	39.7671	1721.99
22.09	E229_14-1-2	1400	5.09	39.4415	1712.31
22.09	E229_14-2-1	1400	4.96	43.8475	2529.4
22.09	E229_14-2-2	1400	4.95	42.8094	2517.72
22.09	E229_14-3-1	1400	5.08	45.0607	2468.6
22.09	E229_14-3-2	1400	5.1	45.1155	2469.21

## Sheet: Microbial_Properties
Sampling_date	Sample_id	Elevation_level	Enzyme_CBH	Enzyme_BG	Enzyme_NAG	Enzyme_AP	Enzyme_BX	Soil_MBC
21.09	E6-1-1	600	3.43876	21.0729	15.9924			1412.15
21.09	E6-1-2	600	44.7364	135.134	92.7773			1398.1
21.09	E6-2-1	600	1.49845	18.8628	25.7844			1091.59
21.09	E6-2-2	600	4.86291	49.8495	61.7356			1163.32
21.09	E10-1-1	1000	21.8789	59.5224	13.9189			556.71
21.09	E10-1-2	1000	47.3268	163.405	41.5981			679.59
21.09	E10-2-1	1000	10.4281	58.4688	15.9693			855.92
21.09	E10-2-2	1000	56.6549	238.741	57.2094			967.28
21.09	E10-3-1	1000	15.5576	123.022	405.249			1433.61
21.09	E10-3-2	1000	37.5061	209.565	660.753			1570.67
21.09	E14-1-1	1400	4.29279	29.3005	15.1314			1145.28
21.09	E14-1-2	1400	16.434	82.1201	44.3839			1440.83
21.1	E2110-6-1-1	600	4.39922	37.0404	40.9062			1551.96
21.1	E2110-6-1-2	600	4.53801	37.3588	39.8238			1573.14
21.1	E2110-6-2-1	600	4.25062	30.5248	28.5594			1412.73
21.1	E2110-6-2-2	600	4.56405	32.6019	29.0399			1475.26
21.1	E2110-6-3-1	600	2.16767	31.099	92.3709			1846.82
21.1	E2110-6-3-2	600	2.42565	32.0294	90.1623			1838.9
21.1	E2110-12-1-1	1200	9.64043	77.8205	28.9623			2184.7
21.1	E2110-12-1-2	1200	10.1056	80.1396	27.9874			2153.1
21.1	E2110-12-2-1	1200	6.72587	43.2439	20.94			2179.14
21.1	E2110-12-2-2	1200	6.69176	46.4052	19.509			2241.5
21.1	E2110-12-3-1	1200	8.84244	74.0914	26.9126			2024.9
21.1	E2110-12-3-2	1200	9.00272	78.6185	27.9759			2050.52
22.04	E224-6-1-1	600	1	31.6	27.24	114.54	9.95	1509.21
22.04	E224-6-1-2	600	-0.18	31.2	30.85	108.74	8.9	1521.15
22.04	E224-6-2-1	600	5.12	45.3	29.12	159.12	14.23	1652.41
22.04	E224-6-2-2	600	3.98	40.5	20.07	159.77	7.69	1678.49
22.04	E224-6-3-1	600	0.83	37.2	42.14	101.87	14.76	1719.68
22.04	E224-6-3-2	600	0.12	31.4	24.13	113.39	18.35	1732.19
22.04	E224-10-1-1	1000	16.11	104.6	34.38	66.53	25.12	1068.91
22.04	E224-10-1-2	1000	10.01	93.9	25.58	86.94	23.22	1077.81
22.04	E224-10-2-1	1000	46.75	184.1	24.87	101.88	29.96	1157.88
22.04	E224-10-2-2	1000	32.61	123.4	14.84	124.86	19.42	1166.22
22.04	E224-14-1-1	1400	22.95	148.2	38.79	102.69	87.65	1801.11
22.04	E224-14-1-2	1400	19.38	136	34.79	139.57	79.61	1813.18
22.04	E224-14-2-1	1400	19.36	107.3	33.01	93.42	79.45	1968.02
22.04	E224-14-2-2	1400	13.28	118.3	24.83	126.38	71.46	1952.7
22.04	E224-14-3-1	1400	47.59	151.1	17.52	138.16	65.32	2010.89
22.04	E224-14-3-2	1400	35.75	122.1	15.89	222.87	71.4	2042.44
22.09	E229_6-1-1	600	1.76	18.5	8.35	201.56	8.22	1323.56
22.09	E229_6-1-2	600	1.8	18.3	9.3	212.22	7.17	1330.54
22.09	E229_6-2-1	600	0.98	12.6	19.33	196.02	3.25	1821.65
22.09	E229_6-2-2	600	0.83	12	19.61	243.42	2.61	1848.6
22.09	E229_6-3-1	600	0.85	18.25	14.11	242.29	7.38	1868.04
22.09	E229_6-3-2	600	1.21	12.5	13.69	280.93	7.9	1872.34
22.09	E229_10-1-1	1000	2.58	29.5	4.83	132.66	4.54	1185.92
22.09	E229_10-1-2	1000	2.05	23.7	4.68	108.97	4.37	1175.59
22.09	E229_10-2-1	1000	11.77	72.2	12.22	157.81	13.96	1030.78
22.09	E229_10-2-2	1000	11.14	68	11.59	138.9	11.4	1040.59
22.09	E229_10-3-1	1000	0.93	10.68	30.64	528.74	3.42	2560.44
22.09	E229_10-3-2	1000	0.99	10	29.95	514.18	4.61	2627.55
22.09	E229_12-1-1	1200	2.41	25	11.74	202.37	24.36	1799.65
22.09	E229_12-1-2	1200	2.49	26.5	11.67	195.98	20.87	1773.88
22.09	E229_12-2-1	1200	3.93	33.4	26.9	125.7	23.22	2517.3
22.09	E229_12-2-2	1200	3.99	35.1	23.39	162.8	23.39	2517.42
22.09	E229_12-3-1	1200	6.17	50.81	16.02	192.89	16.81	2125.52
22.09	E229_12-3-2	1200	5.41	52.7	13.21	219.65	16.15	2147.82
22.09	E229_14-1-1	1400	3.82	37.8	9.38	182.33	20.56	1721.99
22.09	E229_14-1-2	1400	4.86	31.3	9.81	190.81	18	1712.31
22.09	E229_14-2-1	1400	2.97	25	15.66	212.09	13.67	2529.4
22.09	E229_14-2-2	1400	2.63	25.9	14.1	209.67	10.93	2517.72
22.09	E229_14-3-1	1400	6.97	48.37	13.05	230.93	27.87	2468.6
22.09	E229_14-3-2	1400	5.71	42.8	13.57	241.34	26.95	2469.21

## Sheet: Diversity_Metrics
Sampling_date	Sample_id	Elevation_level	Shannon	Simpson
21.09	E6-1-1	600	3.9136	0.9446
21.09	E6-1-2	600	3.8566	0.9314
21.09	E6-2-1	600	3.7247	0.8651
21.09	E6-2-2	600	2.843	0.7506
21.09	E10-1-1	1000	2.8866	0.6954
21.09	E10-1-2	1000	4.9161	0.9806
21.09	E10-2-1	1000	5.0858	0.9799
21.09	E10-2-2	1000	4.7805	0.973
21.09	E10-3-1	1000	3.9775	0.9597
21.09	E10-3-2	1000	4.1094	0.9635
21.09	E14-1-1	1400	3.8889	0.9347
21.09	E14-1-2	1400	3.7817	0.9269
22.09	E22_600-1	600	4.2074	0.93
22.09	E22_600-2	600	4.5581	0.9685
22.09	E22_600-3	600	4.636	0.9806
22.09	E22_1000-1	1000	4.8737	0.977
22.09	E22_1000-2	1000	4.4541	0.9396
22.09	E22_1000-3	1000	4.1092	0.9602
22.09	E22_1200-1	1200	3.5488	0.8726
22.09	E22_1200-2	1200	4.1951	0.9527
22.09	E22_1200-3	1200	4.169	0.9647
22.09	E22_1400-1	1400	4.3878	0.9682
22.09	E22_1400-2	1400	4.2529	0.9663
22.09	E22_1400-3	1400	4.4496	0.9669
